# Supplementary material for: Photochemical and photophysical behavior of indolyl anions in photostimulated intramolecular arylation reactions
Source: Royal Society of Chemistry journal article supplement (doi:10.1039/c2ob26698a), 2012-01-01

## Photochemical and Photophysical Behavior of Indolyl Anions in Photostimulated Intramolecular Arylation Reactions.

Victoria A. Vaillard<sup>a</sup>, Roberto A. Rossi\*<sup>a</sup> and Juan E. Argüello\*<sup>a</sup>

<sup>a</sup> INFIQC, Departamento de Química Orgánica, Facultad de Ciencias Químicas, Universidad Nacional de Córdoba, Ciudad Universitaria, Córdoba, 5000 Argentina Fax: +54 351 4333030.

E-mail: [rossi@fcq.unc.edu.ar](mailto:rossi@fcq.unc.edu.ar) and [jea@fcq.unc.edu.ar](mailto:jea@fcq.unc.edu.ar)

### Supporting Information

|                                                                                                                                                                                                 | Page        |
|-------------------------------------------------------------------------------------------------------------------------------------------------------------------------------------------------|-------------|
| Uv-vis spectra for compounds <b>1b-c</b> and anions derivatives <b>3b-c</b> (Figure S1)                                                                                                         | <b>S2</b>   |
| Excitation and fluorescence spectra for anions <b>3b-c</b> (Figure S2)                                                                                                                          | <b>S2</b>   |
| Fluorescence quantum yields ( $\Phi_f$ ) for anions <b>3a-c</b> .                                                                                                                               | <b>S3</b>   |
| Fluorescence quenching for anions <b>3a</b> and <b>3c</b> by successive additions of increasing concentrations of <i>t</i> -BuOK and Stern-Volmer plots for <b>3a</b> and <b>3c</b> (Figure S3) | <b>S4</b>   |
| Spectroscopy data for compounds <b>1a-c</b> and <b>2</b> .                                                                                                                                      | <b>S5-8</b> |

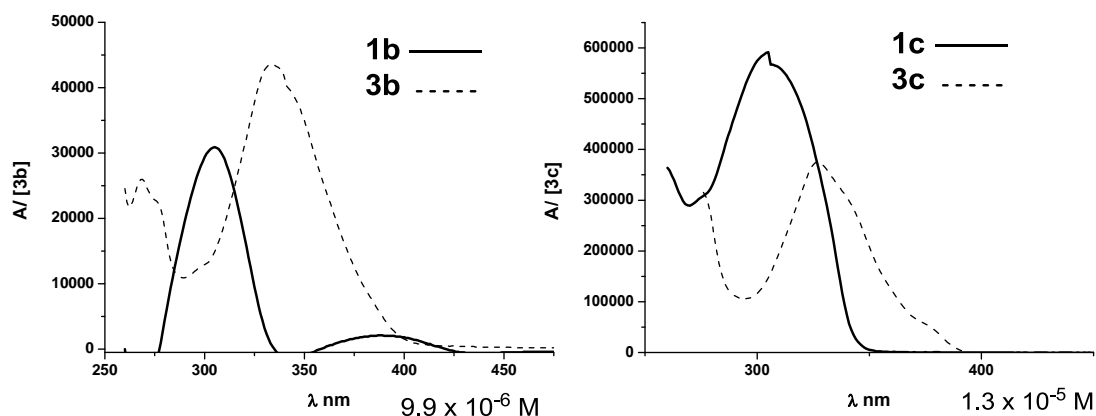

**Figure S1:** UV-vis spectra for compounds **1b-c** and anions derivatives **3b-c**. Spectra were performed under  $N_2$  in DMSO. To form the anions, a solution of *t*-BuOK  $9.9 \times 10^{-4}$  M was added and the mixture was incubated for 5 min. Solid line: neutral. Dotted line: anion.

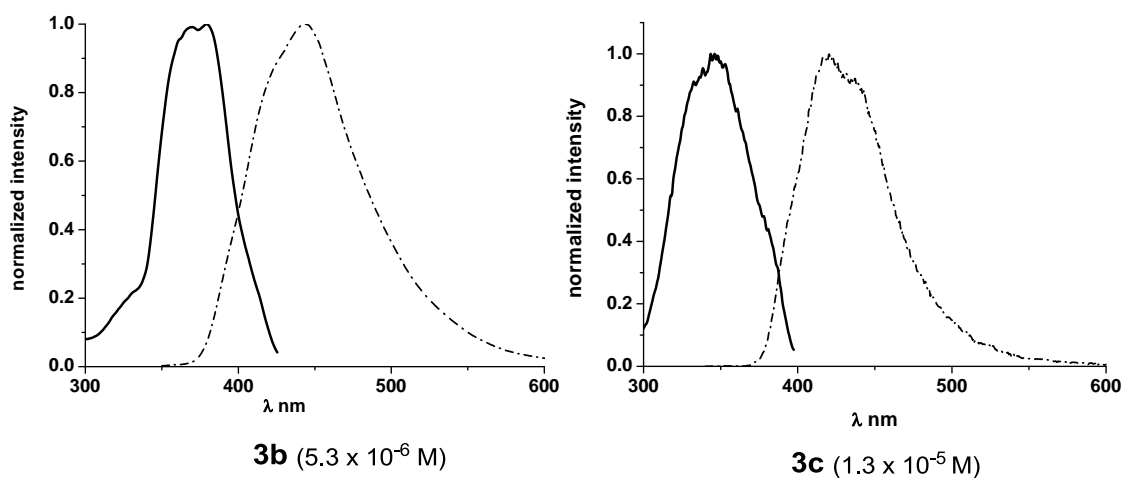

**Figure S2:** Excitation (solid line—) and fluorescence (dotted line ....) spectra for **3b-c**. Spectra were performed under  $N_2$  in DMSO. To form anions, a solution of *t*-BuOK  $9.9 \times 10^{-4}$  M was added and the mixture was incubated for 5 min.

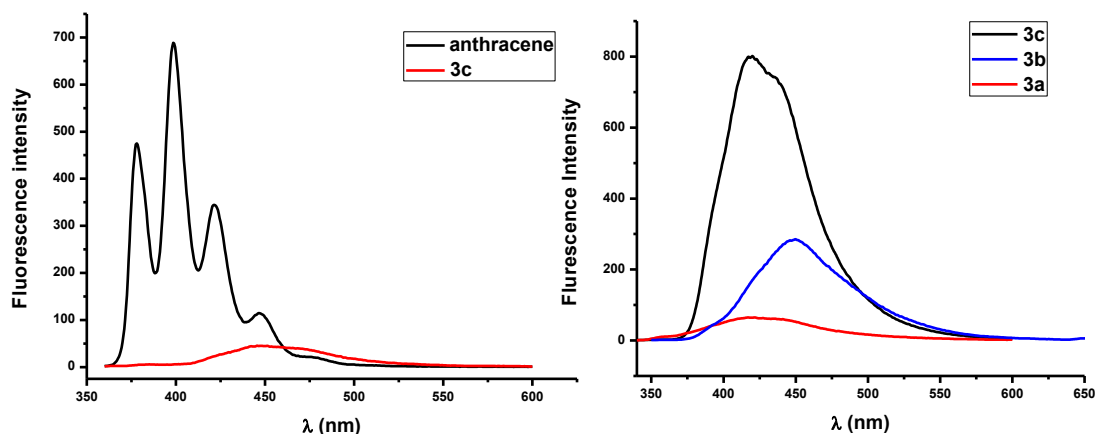

|                   | anthracene             | 3c <sup>b</sup>         | 3b <sup>b</sup>         | 3a <sup>b</sup>         |
|-------------------|------------------------|-------------------------|-------------------------|-------------------------|
| concentration (M) | 3,1 x 10 <sup>-5</sup> | 4,61 x 10 <sup>-6</sup> | 5,26 x 10 <sup>-6</sup> | 6,31 x 10 <sup>-6</sup> |
| λ max. (nm)       | 356                    | 327                     | 332                     | 339                     |
| solvent           | EtOH 95 %              | DMSO                    | DMSO                    | DMSO                    |
| RI solvent        | 1,3611                 | 1,4768                  | 1,4768                  | 1,4768                  |
| absorbance        | 0,124                  | 0,140                   | 0,128                   | 0,127                   |

<sup>a</sup>Measurements were performed under N<sub>2</sub>, in fluorimeter Perkin Elmer LS55 Fluorescence Spectrometers. <sup>b</sup>To form anions **3a-c**, *t*-BuOK was added (final concentration: 9,9 x 10<sup>-4</sup> M).

Fluorescence quantum yields were calculated according the following equation,

$$\Phi_{f3} = \Phi_{reference} \times \frac{area_3}{area_{reference}} \times \frac{Abs_{reference}}{Abs_3} \times \frac{(RI_3)^2}{(RI_{reference})^2}$$

Where  $\Phi_{reference}$  is the fluorescence quantum yield of the reference, area is the integrated area under the fluorescence spectra of compound **3** and the reference, Abs are the absorbance of **3** and the reference, RI is the refractive index of the solvent employed. To determine values of  $\Phi_f$  for **3a-b**, **3c** was used as reference using the same equation.

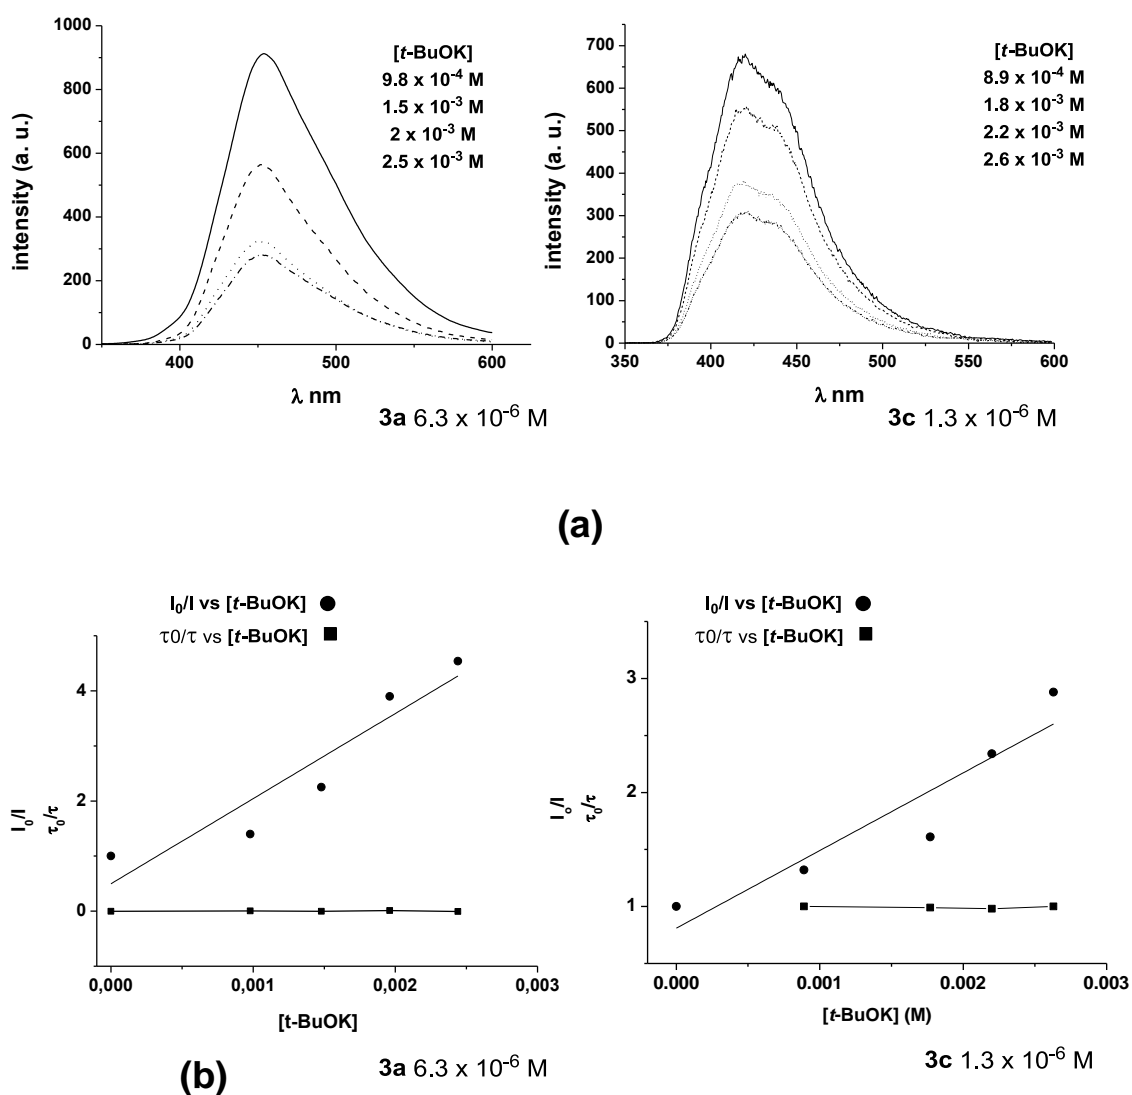

**Figure S3:** (a) Fluorescence quenching to **3a** and **3c** by successive additions of increasing concentrations of  $t$ -BuOK. (b) Stern-Volmer plots to **3a** and **3c** (static quenching).

$^1\text{H}$  NMR *N*-(2-bromophenyl)-1*H*-indole-2-carboxamide ( $\text{CDCl}_3$ ) **1a**

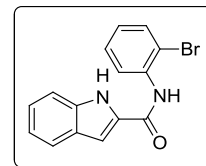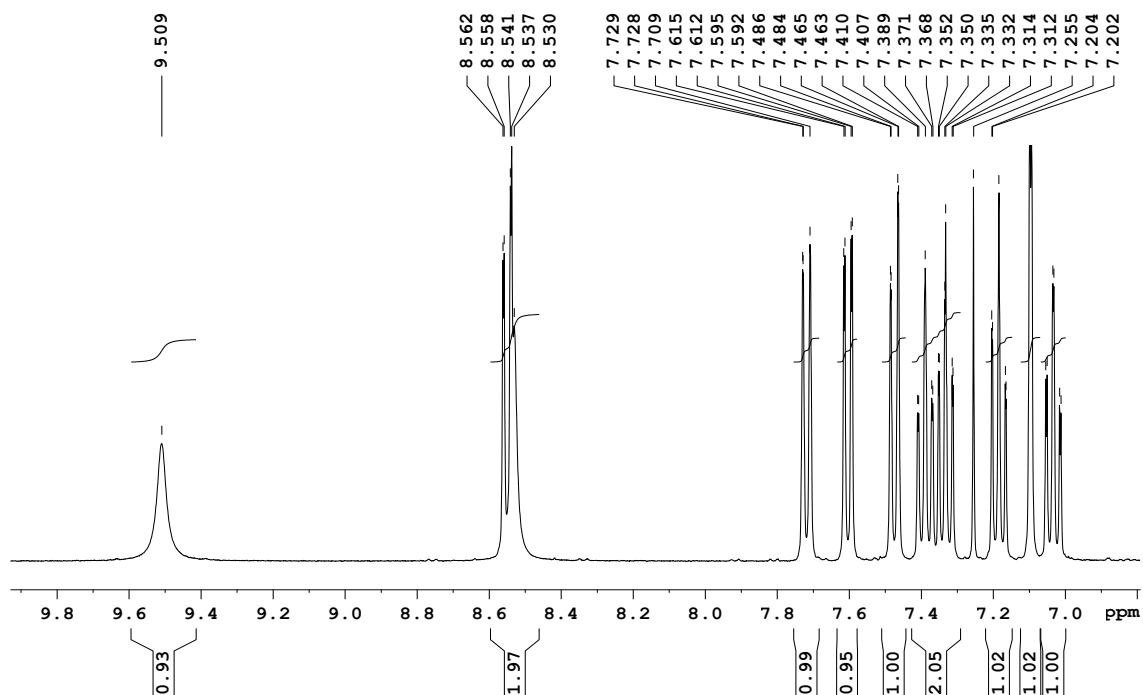

$^{13}\text{C}$  NMR *N*-(2-bromophenyl)-1*H*-indole-2-carboxamide ( $\text{CDCl}_3$ ) **1a**

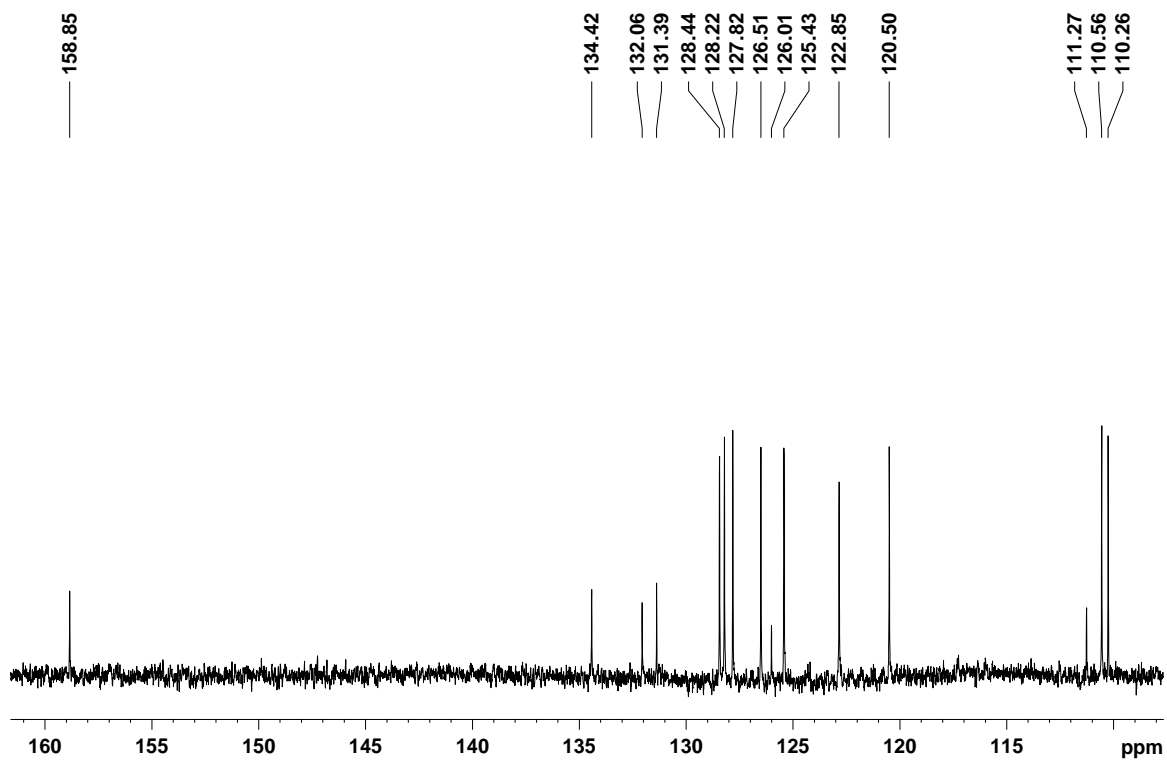

$^1\text{H}$  NMR *N*-(2-chlorophenyl)-1*H*-indole-2-carboxamide ( $\text{CDCl}_3$ ) **1b**.

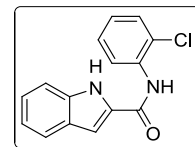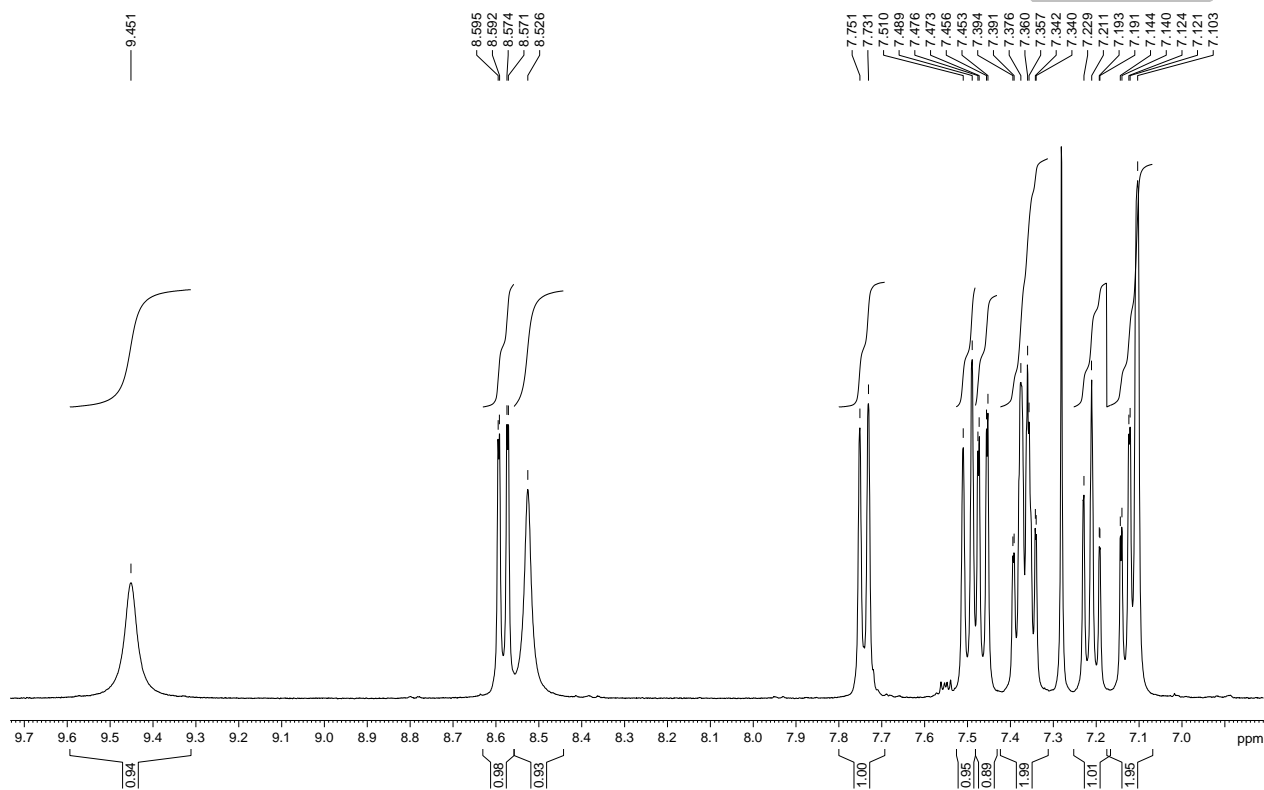

$^{13}\text{C}$  NMR *N*-(2-chlorophenyl)-1*H*-indole-2-carboxamide ( $\text{CDCl}_3$ ) **1b**.

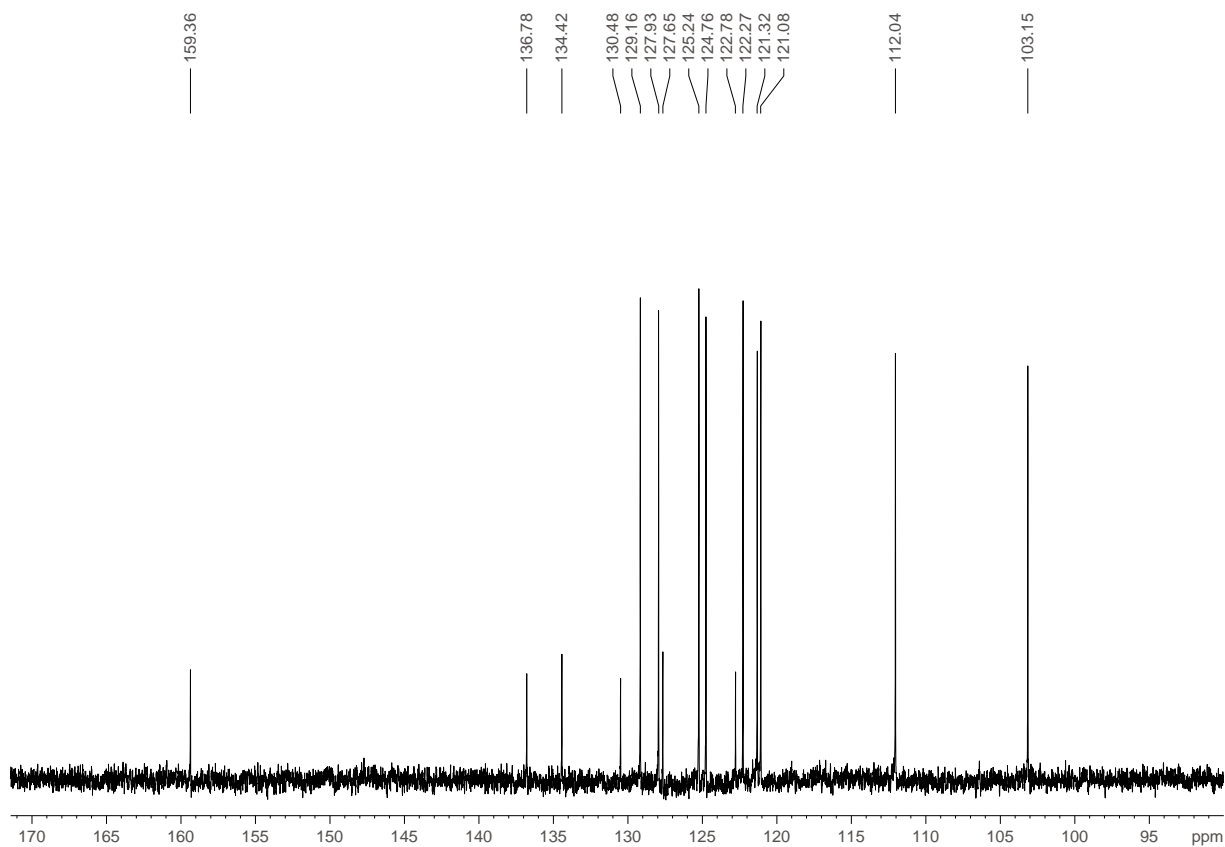

$^1\text{H}$  NMR *N*-phenyl-1H-indole-2-carboxamide ( $\text{CDCl}_3$ ) **1c**.

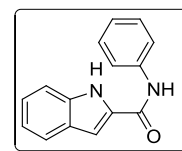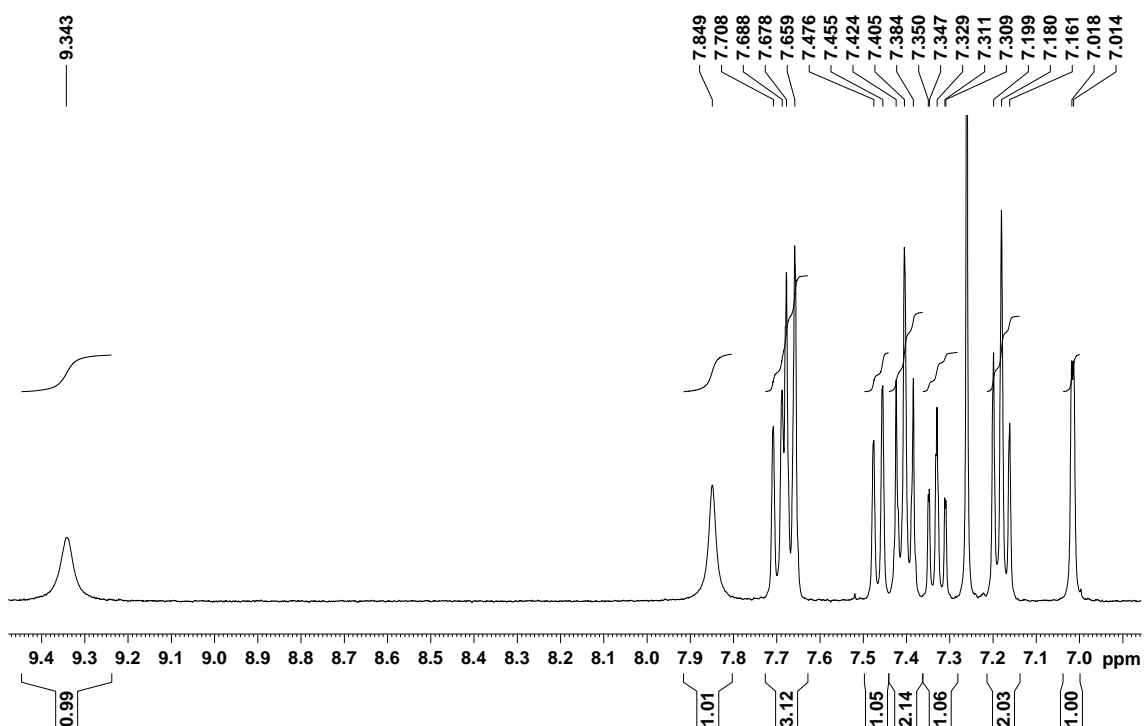

$^{13}\text{C}$  NMR *N*-phenyl-1H-indole-2-carboxamide ( $\text{CDCl}_3$ ) **1c**.

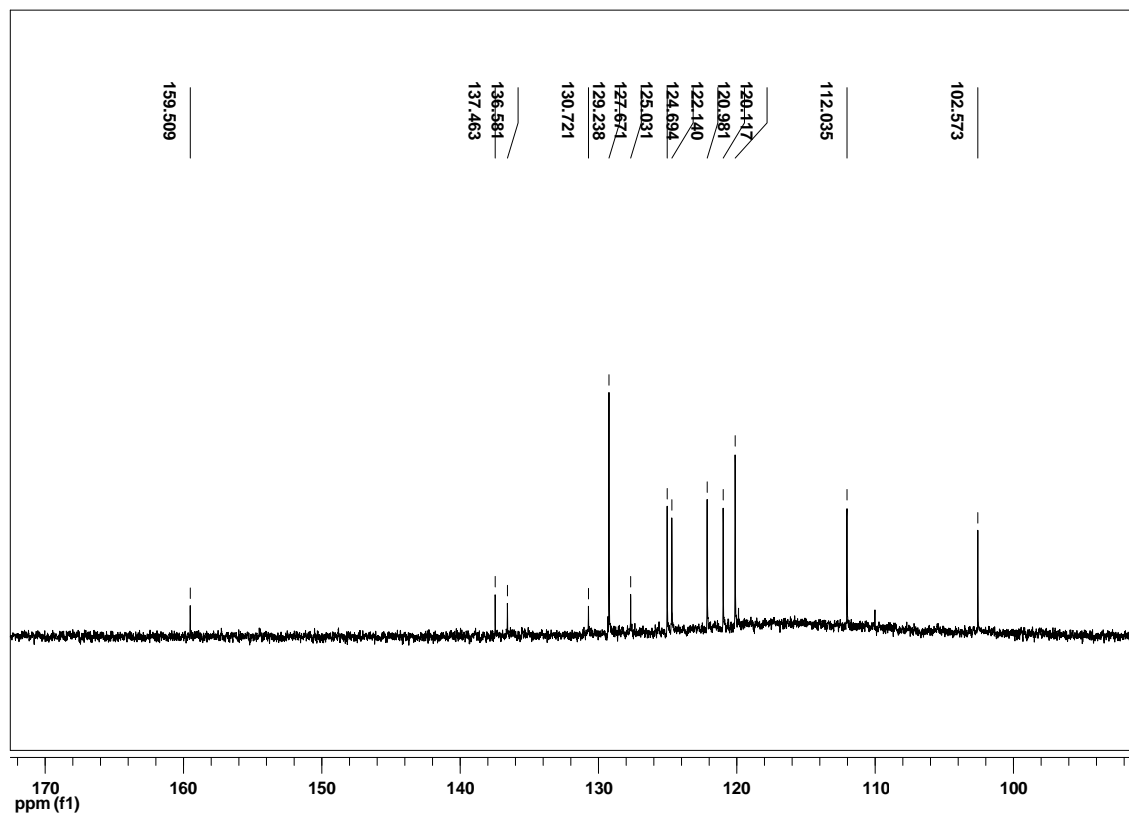

$^1\text{H}$  NMR 2-(1*H*-indol-2-yl)benzo[*d*]oxazole ( $\text{CDCl}_3$ ) **2**.

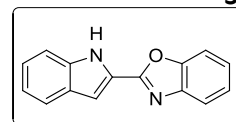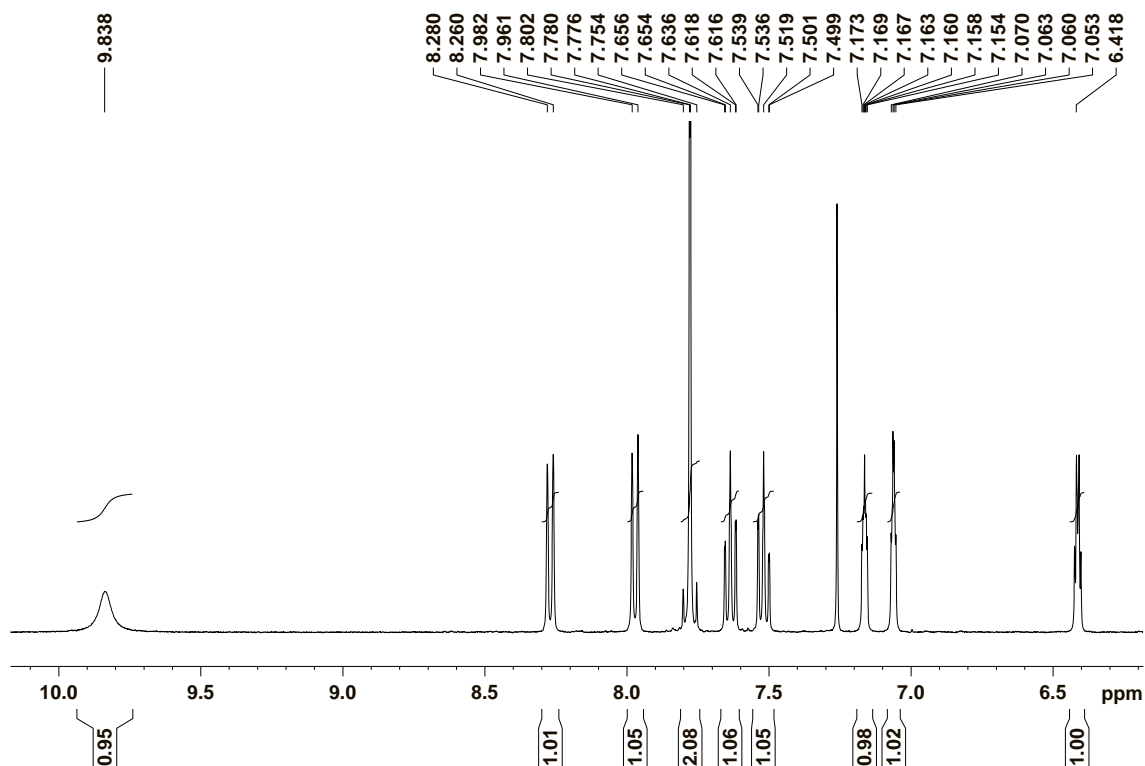

$^{13}\text{C}$  NMR 2-(1*H*-indol-2-yl)benzo[*d*]oxazole ( $\text{CDCl}_3$ ) **2**.

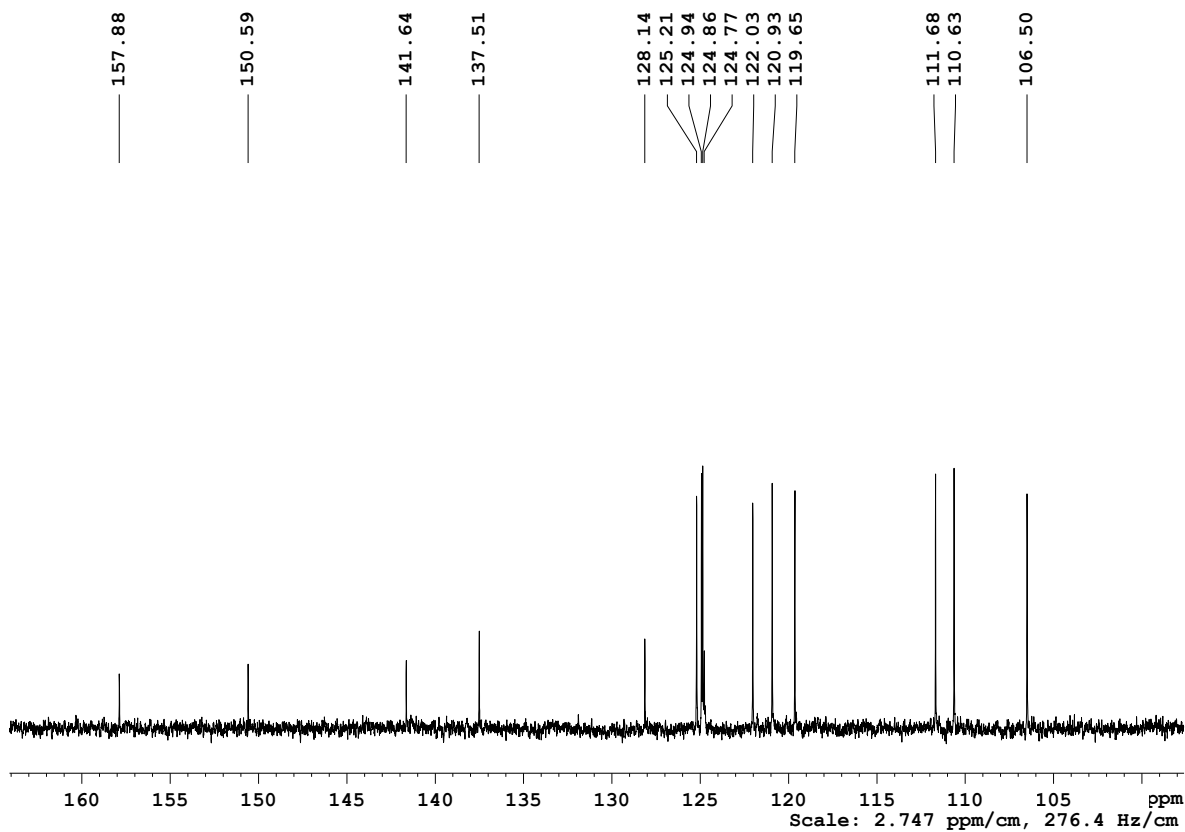

Supplement: c2ob26698a.pdf [file c2ob26698a.pdf]
